# Supplementary material
Source: PubMed Central journal article supplement (PMC8852837)
Supplement: NIHMS1772890-supplement-2.pdf [file NIHMS1772890-supplement-2.pdf]

## Supplemental Figure

**Figure S1. Flow of patients.** Flow of patients for study inclusion. FLIP – functional luminal imaging probe. HRM – high-resolution manometry. TBE – timed barium esophagram.

## Supplemental Table

**Table S1. Binary logistic regression for prediction of timed barium esophagram**

**column height >5 cm at 5-minutes. S1A** reflects the binary logistic regression model that included the entire cohort (n=329). **S1B** reflects the subgroup analysis that omitted patients with achalasia or absent contractility on high-resolution manometry (n=186); 24/186 (13%) met the threshold for an abnormal TBE. <sup>a</sup>Defined by type II or type III EGJ-morphology on high-resolution manometry.<sup>4</sup> SE – standard error. OR – odds ratio. IRP – integrated relaxation pressure.

| <b>S1A – Total Cohort</b>                |          |           |                    |          |
|------------------------------------------|----------|-----------|--------------------|----------|
|                                          | <b>B</b> | <b>SE</b> | <b>OR (95% CI)</b> | <b>P</b> |
| <b>Age</b>                               | -0.16    | 0.01      | 0.99 (0.97-1.0)    | 0.093    |
| <b>Female Gender</b>                     | -0.56    | 0.30      | 0.57 (0.32-1.0)    | 0.061    |
| <b>Hiatal hernia present<sup>a</sup></b> | 1.2      | 0.44      | 3.2 (1.3-7.5)      | 0.009    |
| <b>IRP classification (normal IRP)</b>   | --       |           |                    | 0.051    |
| <b>Isolated IRP elevation</b>            | 0.10     | 0.52      | 1.1 (0.40-3.1)     | 0.850    |
| <b>Consistent IRP elevation</b>          | 0.84     | 0.43      | 2.3 (0.99-5.4)     | 0.051    |
| <b>FLIP-EGJ (Normal EGJ opening)</b>     | --       |           |                    | <0.001   |
| <b>Borderline-normal EGJ opening</b>     | 0.83     | 0.76      | 2.3 (0.52-10.0)    | 0.274    |
| <b>Borderline-reduced EGJ opening</b>    | 2.5      | 0.63      | 11.9 (3.5-41.0)    | <0.001   |
| <b>Reduced EGJ opening</b>               | 3.3      | 0.57      | 28.1 (9.1-86.7)    | <0.001   |
| <b>Constant</b>                          | -3.1     | 0.89      | 0.04               | <0.001   |

| <b>S1B – Subgroup</b>                    |          |           |                    |          |
|------------------------------------------|----------|-----------|--------------------|----------|
|                                          | <b>B</b> | <b>SE</b> | <b>OR (95% CI)</b> | <b>P</b> |
| <b>Age</b>                               | -0.01    | 0.02      | 0.99 (0.96-1.03)   | 0.675    |
| <b>Female Gender</b>                     | -1.0     | 0.56      | 0.36 (0.12-1.1)    | 0.070    |
| <b>Hiatal hernia present<sup>a</sup></b> | 1.1      | 0.73      | 2.9 (0.70-12.2)    | 0.141    |
| <b>IRP classification (normal IRP)</b>   | --       |           |                    | 0.933    |
| <b>Isolated IRP elevation</b>            | -0.08    | 0.89      | 0.93 (0.16-5.2)    | 0.93     |
| <b>Consistent IRP elevation</b>          | -0.25    | 0.70      | 0.78 (0.20-3.1)    | 0.782    |
| <b>FLIP-EGJ (Normal EGJ opening)</b>     | --       |           |                    | <0.001   |
| <b>Borderline-normal EGJ opening</b>     | 0.69     | 1.5       | 2.0 (0.11-34.1)    | 0.637    |
| <b>Borderline-reduced EGJ opening</b>    | 1.3      | 1.5       | 3.7 (0.21-66.1)    | 0.376    |
| <b>Reduced EGJ opening</b>               | 4.0      | 1.1       | 56.9 (6.4-504)     | <0.001   |
| <b>Constant</b>                          | -4.1     | 1.6       | 0.02               | 0.008    |
